# Supplementary material for: Food Choice Determinants and Perceptions of a Healthy Diet among Italian Consumers
Source: MDPI journal article supplement (doi:10.3390/foods10020318), 2021-02-03
Supplement: s1 [file s1]

## Supplementary Material

**Table S1.** Overview of measures used in the study.

| Measures                                  | Item/Statement                                                                           | Scale                                                              |
|-------------------------------------------|------------------------------------------------------------------------------------------|--------------------------------------------------------------------|
| Perception about Healthy Eating           | Indicate your opinion about the following statements.                                    |                                                                    |
| P.1                                       | A healthy diet is based on calorie count                                                 |                                                                    |
| P.2                                       | We should never consume sugary products                                                  |                                                                    |
| P.3                                       | Fruit and vegetables are very important to a practice of a healthy eating                |                                                                    |
| P.4                                       | A healthy diet should be balanced, varied and complete                                   | 5-point scale from “Strongly Disagree” (1) to “Strongly Agree” (5) |
| P.5                                       | We can eat everything, as long as it is in small quantities                              |                                                                    |
| P.6                                       | I believe that a healthy diet is not cheap                                               |                                                                    |
| P.7                                       | In my opinion it is strange that some people have cravings for sweets                    |                                                                    |
| P.8                                       | I believe that tradition is very important to a healthy diet                             |                                                                    |
| P.9                                       | I believe that food produced in a biological way is healthier                            |                                                                    |
| P.10                                      | We should never consume fat products                                                     |                                                                    |
| Sources of information about healthy diet | Where do you usually find information about eating a healthy diet?                       |                                                                    |
|                                           | Indicate with what frequency you find information about eating a healthy diet.           |                                                                    |
| I.1                                       | Health centres, hospitals, general practitioner                                          |                                                                    |
| I.2                                       | Radio                                                                                    | 5-point scale from “Never” (1) to “Always” (5)                     |
| I.3                                       | Television                                                                               |                                                                    |
| I.4                                       | School                                                                                   |                                                                    |
| I.5                                       | Magazines, books, newspapers                                                             |                                                                    |
| I.6                                       | Internet                                                                                 |                                                                    |
| I.7                                       | Family, friends                                                                          |                                                                    |
| <b>Food choice motivations</b>            | Indicate your opinion about the following statements.                                    |                                                                    |
| Health Motivations                        |                                                                                          |                                                                    |
| M1.1                                      | I am very concerned about the hygiene and safety of the food I eat                       |                                                                    |
| M1.2                                      | It is important for me that my diet is low in fat                                        |                                                                    |
| M1.3                                      | Usually I follow a healthy and balanced diet                                             |                                                                    |
| M1.4                                      | It is important for me that my daily diet contains a lot of vitamins and minerals        | 5-point scale from “Strongly Disagree” (1) to “Strongly Agree” (5) |
| M1.5                                      | There are some foods that I consume regularly, even if they may raise my cholesterol     |                                                                    |
| M1.6                                      | I try to eat foods that do not contain additives                                         |                                                                    |
| M1.7                                      | I avoid eating processed foods, because of their lower nutritional quality               |                                                                    |
| M1.8                                      | It is important for me to eat food that keeps me healthy                                 |                                                                    |
| M1.9                                      | There are some foods that I consume regularly, even if they may raise my blood glycaemia |                                                                    |
| M1.10                                     | I avoid foods with genetically modified organisms                                        |                                                                    |

|                                         |                                                                                               |                                                                    |
|-----------------------------------------|-----------------------------------------------------------------------------------------------|--------------------------------------------------------------------|
| Emotional motivations                   |                                                                                               |                                                                    |
| M2.1                                    | Food helps me cope with stress                                                                | 5-point scale from “Strongly Disagree” (1) to “Strongly Agree” (5) |
| M2.2                                    | I usually eat food that helps me control my weight                                            |                                                                    |
| M2.3                                    | I often consume foods that keep me awake and alert (such as coffee, coke, energy drinks)      |                                                                    |
| M2.4                                    | I often consume foods that helps me relax (such as some teas, red wine)                       |                                                                    |
| M2.5                                    | Food makes me feel good                                                                       |                                                                    |
| M2.6                                    | When I feel lonely, I console myself by eating                                                |                                                                    |
| M2.7                                    | I eat more when I have nothing to do                                                          |                                                                    |
| M2.8                                    | For me, food serves as an emotional consolation                                               |                                                                    |
| M2.9                                    | I have more cravings for sweets when I am depressed                                           |                                                                    |
| Economic and availability motivations   |                                                                                               |                                                                    |
| M3.1                                    | I usually choose food that has a good quality/price ratio                                     | 5-point scale from “Strongly Disagree” (1) to “Strongly Agree” (5) |
| M3.2                                    | The main reason for choosing a food is its low price                                          |                                                                    |
| M3.3                                    | I choose the food I consume, because it is convenient to purchase                             |                                                                    |
| M3.4                                    | I buy fresh vegetables to cook myself more often than frozen                                  |                                                                    |
| M3.5                                    | I usually buy food that is easy to prepare                                                    |                                                                    |
| M3.6                                    | I usually buy food that it is on sale                                                         |                                                                    |
| M3.7                                    | I prefer to buy food that is ready to eat or pre-cooked                                       |                                                                    |
| Social & cultural motivations           |                                                                                               |                                                                    |
| M4.1                                    | Meals are a time of fellowship and pleasure                                                   | 5-point scale from “Strongly Disagree” (1) to “Strongly Agree” (5) |
| M4.2                                    | I eat more than usual when I have company                                                     |                                                                    |
| M4.3                                    | It is important to me that the food I eat is similar to the food I ate when I was a child     |                                                                    |
| M4.4                                    | I eat certain foods because other people (my colleagues, friends, family) also eat it         |                                                                    |
| M4.5                                    | I prefer to eat alone                                                                         |                                                                    |
| M4.6                                    | I choose the foods I eat, because it fits the season                                          |                                                                    |
| M4.7                                    | I eat certain foods because I am expected to eat them                                         |                                                                    |
| M4.8                                    | I like to try new foods to which I am not accustomed                                          |                                                                    |
| M4.9                                    | I usually eat food that is trendy                                                             |                                                                    |
| Environmental and political motivations |                                                                                               |                                                                    |
| M5.1                                    | It is important to me that the food I eat is prepared/packed in an environmental friendly way | 5-point scale from “Strongly Disagree” (1) to “Strongly Agree” (5) |
| M5.2                                    | When I cook I have in mind the quantities to avoid food waste                                 |                                                                    |
| M5.3                                    | It is important to me that the food I eat comes from my own country                           |                                                                    |
| M5.4                                    | I prefer to eat food that has been produced in a way that animals' rights have been respected |                                                                    |
| M5.5                                    | I choose foods that have been produced in countries where human rights are not violated       |                                                                    |
| M5.6                                    | I avoid going to restaurants that do not have a recovery policy of food surplus               |                                                                    |
| M5.7                                    | I prefer to buy foods that comply with policies of minimal usage of packaging                 |                                                                    |

| Marketing and commercials motivations |                                                                                                                        |                                                                    |
|---------------------------------------|------------------------------------------------------------------------------------------------------------------------|--------------------------------------------------------------------|
| M6.1                                  | When I buy food I usually do not care about the marketing campaigns happening in the shop                              | 5-point scale from "Strongly Disagree" (1) to "Strongly Agree" (5) |
| M6.2                                  | I eat what I eat, because I recognize it from advertisements or have seen it on TV                                     |                                                                    |
| M6.3                                  | I usually buy food that spontaneously appeals to me (e.g. situated at eye level, appealing colors, pleasant packaging) |                                                                    |
| M6.4                                  | When I go shopping I prefer to read food labels instead of believing in advertising campaigns                          |                                                                    |
| M6.5                                  | Food advertising campaigns increase my desire to eat certain foods                                                     |                                                                    |
| M6.6                                  | Brands are important to me when making food choices                                                                    |                                                                    |
| M6.7                                  | I try to schedule my food shopping for when I know there are promotions or discounts                                   |                                                                    |
